# Supplementary material for: Flexible alternating current electroluminescent devices integrated with high voltage triboelectric nanogenerators
Source: Royal Society of Chemistry journal article supplement (doi:10.1039/d1nr08203e), 2022-01-01
Supplement: d1nr08203e1.pdf [file d1nr08203e1.pdf]

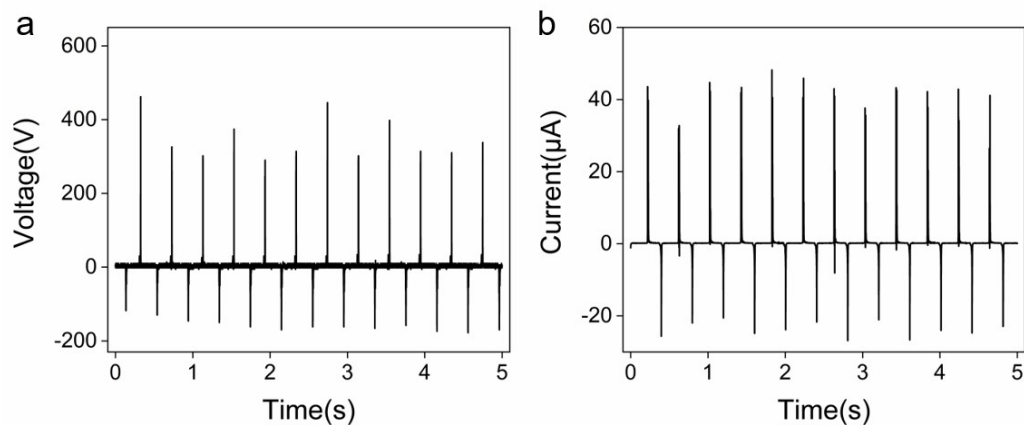

Figure S1. (a) The output voltage and (b) the output current of devices with  $\epsilon_{pre}$  of 500%.

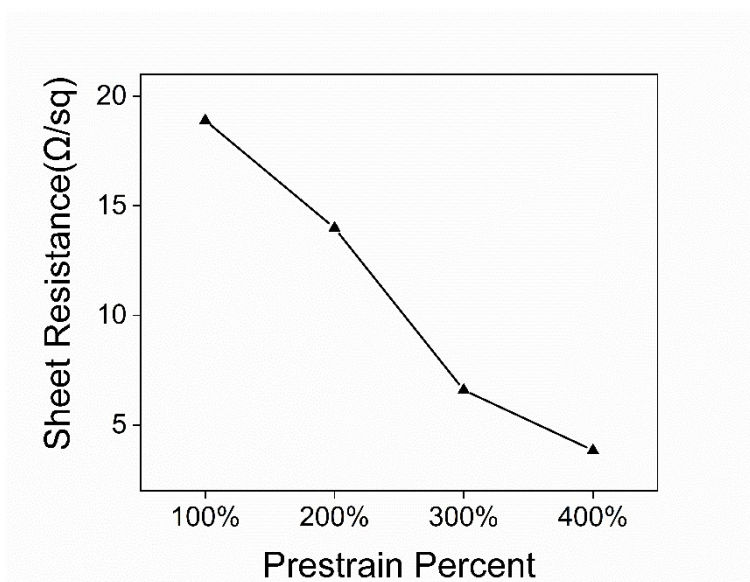

Figure S2. The sheet resistance of crumpled Al films with  $\epsilon_{pre}$  of 100%, 200%, 300%, 400%.

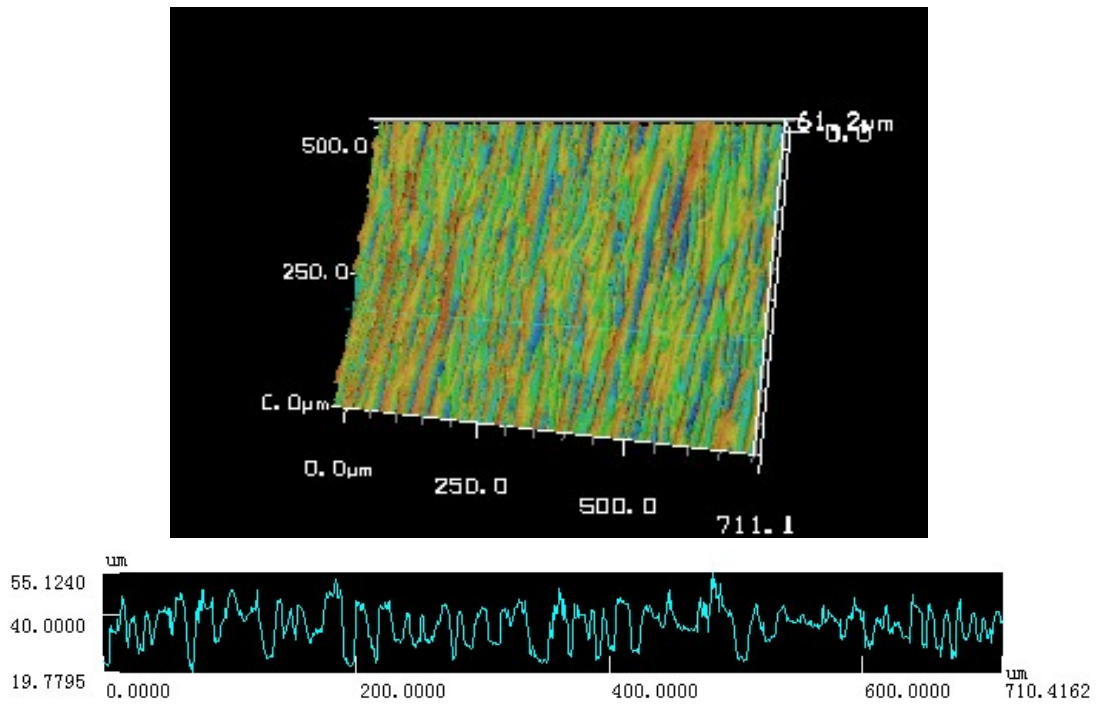

Figure S3. Surface topographic image of a representative crumpled Al film.

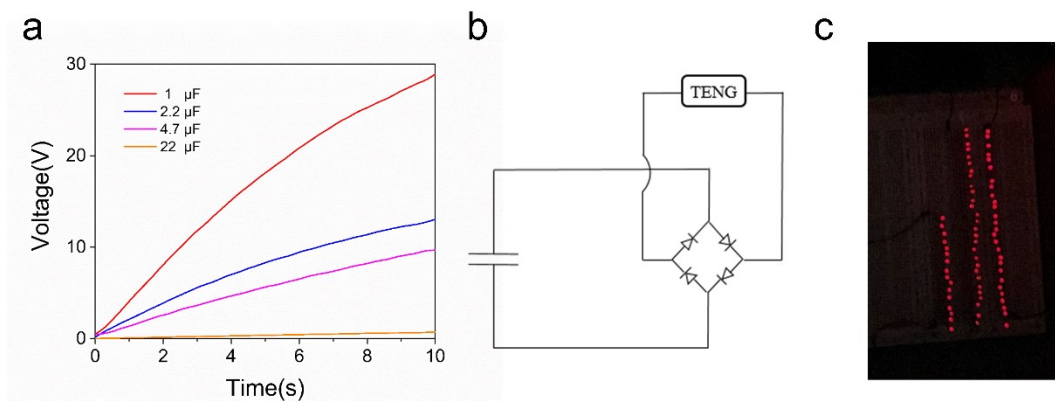

Figure S4. The application of the device. a. The charging curve of the various capacitors. b. Working circuit of the capacitor charging based the TENG. c. A photograph of LEDs lit up by the TENG.

Table S1. A review of different studies about the crumpled-structured TENG

| <b>Related study</b>                                         | <b>Materials</b>               | <b>Device size</b> | <b>Maximum output voltage</b> | <b>Maximum output current</b> | <b>Maximum output power density</b> |
|--------------------------------------------------------------|--------------------------------|--------------------|-------------------------------|-------------------------------|-------------------------------------|
| <i>Nano Energy</i> , 2018, <b>46</b> , 73-80 <sup>49</sup>   | Crumpled gold film             | 1.5 cm × 1 cm      | 124.6 V                       | 10.13 μA                      | 0.22 mW/cm <sup>2</sup>             |
| <i>Nano Energy</i> , 2019, <b>58</b> , 304-311 <sup>50</sup> | Crumpled graphene film         | 1.5 cm × 1 cm      | 80.3 V                        | 25.78 μA                      | 0.25 mW/cm <sup>2</sup>             |
| <i>Nano Energy</i> , 2020, <b>69</b> , 104430 <sup>51</sup>  | Crumpled platinum film         | 1.5 cm × 1 cm      | 175.2 V                       | 11.03 μA                      | 0.518 mW/cm <sup>2</sup>            |
| <i>Nano Energy</i> , 2020, <b>78</b> , 105266 <sup>52</sup>  | Crumpled MoS <sub>2</sub> film | /                  | 25 V                          | 1.2 μA                        | 0.00225 mW/cm <sup>2</sup>          |
| <i>Nano Energy</i> , 2022, <b>92</b> , 106689 <sup>53</sup>  | Crumpled MXene film            | 2 cm × 2 cm        | 16.4 V                        | 2.67 μA                       | 0.00289 mW/cm <sup>2</sup>          |
| This work                                                    | Crumpled aluminum film         | 2 cm × 2 cm        | 490 V                         | 71.74 μA                      | 1.503 mW/cm <sup>2</sup>            |
